# Supplementary material
Source: Springer Nature journal article supplement (https://www.springermedizin.de/resource/supplementary/13054_2008_7159_MOESM6_ESM.pdf/9729096)

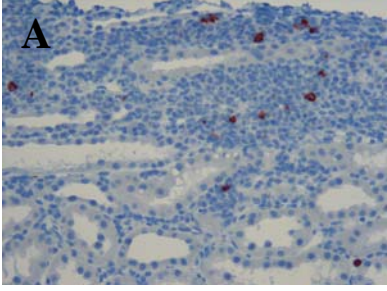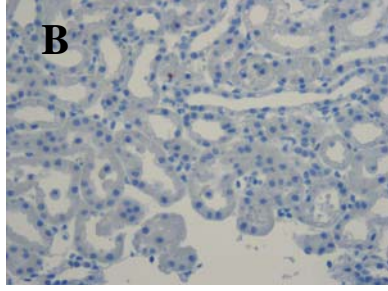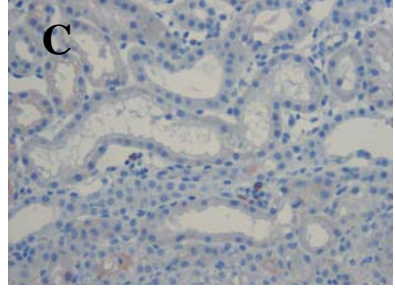

Supplement: MOESM6 [file 9729096]
